# Supplementary material for: Does Governance Quality Matter for the Selection of Policy Stringency to Fight COVID-19?
Source: MDPI journal article supplement (doi:10.3390/ijerph19116679), 2022-05-30
Supplement: s1 [file s1]

## Supplementary Materials

**Table S1 Sample selection**

| Variable         | Source | Proxy                                | Countries |          | Remark                                                                                                         |
|------------------|--------|--------------------------------------|-----------|----------|----------------------------------------------------------------------------------------------------------------|
|                  |        |                                      | included  | excluded |                                                                                                                |
| Dependent        | OxCGRT | Stringency index (SI)                | 185       |          | Original sample basis                                                                                          |
| Independent      | WB     | Worldwide Governance Indicator (WGI) |           | -1       | <sup>x1</sup> (Faeroe Islands)                                                                                 |
|                  |        |                                      |           | -5       | <sup>x2</sup> (U. S. Virgin Islands, Bermuda, Guam, Monaco, San Marino)                                        |
| Control          | WB     | GDP per capita                       |           | -10      | <sup>x3</sup> (Andorra, Cuba, Eritrea, Greenland, Liechtenstein, South Sudan, Syria, Taiwan, Venezuela, Yemen) |
| Control          | WB     | Population                           |           |          |                                                                                                                |
| Control          | WB     | Population density                   |           | -1       | <sup>x4</sup> (Kosovo)                                                                                         |
| Control          | OWID   | Daily new cases                      |           | -4       | <sup>x5</sup> (Kiribati, Puerto Rico, Tonga, Turkmenistan)                                                     |
|                  |        |                                      |           | -1       | <sup>x6</sup> (Libya)                                                                                          |
| Sample countries |        |                                      | 163       |          | See in Table S2                                                                                                |

**Notes:** OxCGRT, WB and UNDP are the short for Oxford COVID-19 Government Response Tracker, the World Bank and United Nations Development. Program individually. ‘x1’ represents countries missing values of all six WGI dimensions. ‘x2’ represents countries missing values of part of WGI dimensions. ‘x3’ represents countries missing the 2019 GDP per capita values. ‘x4’ represents countries missing the 2019 population density values. ‘x5’ represents countries missing daily new cases. I also drop Libya due to the war situation.

Table S2 The list of sample countries

| No. | Continent     | Country                  | Mean_WGI | PCA_WGI | FA_WGI | Governance   |
|-----|---------------|--------------------------|----------|---------|--------|--------------|
|     |               |                          |          |         |        | quality      |
| 1   | Asia          | Afghanistan              | -1.56    | -3.98   | -1.66  | Low level    |
| 2   | Europe        | Albania                  | -0.08    | -0.20   | -0.21  | Low level    |
| 3   | Africa        | Algeria                  | -0.88    | -2.25   | -0.92  | Low level    |
| 4   | Africa        | Angola                   | -0.87    | -2.25   | -1.07  | Low level    |
| 5   | South America | Argentina                | -0.10    | -0.29   | -0.26  | Middle level |
| 6   | South America | Aruba                    | 1.17     | 3.00    | 1.25   | High level   |
| 7   | Oceania       | Australia                | 1.57     | 4.07    | 1.82   | High level   |
| 8   | Europe        | Austria                  | 1.45     | 3.76    | 1.73   | High level   |
| 9   | Asia          | Azerbaijan               | -0.66    | -1.64   | -0.61  | Low level    |
| 10  | North America | Bahamas                  | 0.58     | 1.45    | 0.45   | High level   |
| 11  | Asia          | Bahrain                  | -0.13    | -0.23   | 0.19   | Middle level |
| 12  | Asia          | Bangladesh               | -0.82    | -2.11   | -0.87  | Low level    |
| 13  | North America | Barbados                 | 0.79     | 2.00    | 0.71   | High level   |
| 14  | Europe        | Belarus                  | -0.45    | -1.13   | -0.54  | Middle level |
| 15  | Europe        | Belgium                  | 1.18     | 3.06    | 1.38   | High level   |
| 16  | North America | Belize                   | -0.27    | -0.74   | -0.53  | Middle level |
| 17  | Africa        | Benin                    | -0.34    | -0.90   | -0.49  | Middle level |
| 18  | Asia          | Bhutan                   | 0.56     | 1.45    | 0.60   | High level   |
| 19  | South America | Bolivia                  | -0.71    | -1.86   | -0.95  | Low level    |
| 20  | Europe        | Bosnia and Herzegovina   | -0.38    | -0.97   | -0.41  | Middle level |
| 21  | Africa        | Botswana                 | 0.59     | 1.51    | 0.57   | High level   |
| 22  | South America | Brazil                   | -0.18    | -0.47   | -0.22  | Middle level |
| 23  | Asia          | Brunei                   | 0.60     | 1.61    | 0.76   | High level   |
| 24  | Europe        | Bulgaria                 | 0.28     | 0.72    | 0.20   | Middle level |
| 25  | Africa        | Burkina Faso             | -0.52    | -1.32   | -0.51  | Low level    |
| 26  | Africa        | Burundi                  | -1.42    | -3.61   | -1.49  | Low level    |
| 27  | Asia          | Cambodia                 | -0.78    | -1.99   | -0.93  | Low level    |
| 28  | Africa        | Cameroon                 | -1.12    | -2.84   | -1.16  | Low level    |
| 29  | North America | Canada                   | 1.58     | 4.10    | 1.83   | High level   |
| 30  | Africa        | Cape Verde               | 0.55     | 1.38    | 0.49   | High level   |
| 31  | Africa        | Central African Republic | -1.58    | -4.05   | -1.72  | Low level    |
| 32  | Africa        | Chad                     | -1.36    | -3.48   | -1.47  | Low level    |
| 33  | South America | Chile                    | 0.95     | 2.47    | 1.13   | High level   |
| 34  | Asia          | China                    | -0.36    | -0.86   | -0.25  | Middle level |
| 35  | South America | Colombia                 | -0.14    | -0.34   | -0.16  | Middle level |
| 36  | Africa        | Congo                    | -1.23    | -3.17   | -1.37  | Low level    |
| 37  | Africa        | Congo, Dem. Rep.         | -1.61    | -4.13   | -1.79  | Low level    |
| 38  | North America | Costa Rica               | 0.63     | 1.60    | 0.62   | High level   |
| 39  | Africa        | Cote d'Ivoire            | -0.50    | -1.27   | -0.54  | Low level    |
| 40  | Europe        | Croatia                  | 0.46     | 1.19    | 0.43   | High level   |
| 41  | Europe        | Cyprus                   | 0.83     | 2.14    | 0.89   | High level   |
| 42  | Europe        | Czech Republic           | 0.93     | 2.41    | 1.02   | High level   |
| 43  | Europe        | Denmark                  | 1.68     | 4.36    | 1.97   | High level   |
| 44  | Africa        | Djibouti                 | -0.83    | -2.12   | -0.93  | Low level    |
| 45  | North America | Dominica                 | 0.50     | 1.26    | 0.46   | High level   |
| 46  | North America | Dominican Republic       | -0.22    | -0.57   | -0.35  | Middle level |
| 47  | South America | Ecuador                  | -0.40    | -1.07   | -0.56  | Middle level |
| 48  | Africa        | Egypt                    | -0.81    | -2.02   | -0.70  | Low level    |
| 49  | North America | El Salvador              | -0.29    | -0.77   | -0.49  | Middle level |
| 50  | Europe        | Estonia                  | 1.24     | 3.22    | 1.43   | High level   |
| 51  | Africa        | Eswatini                 | -0.66    | -1.67   | -0.66  | Low level    |
| 52  | Africa        | Ethiopia                 | -0.79    | -1.99   | -0.71  | Low level    |
| 53  | Oceania       | Fiji                     | 0.25     | 0.62    | 0.15   | Middle level |
| 54  | Europe        | Finland                  | 1.74     | 4.53    | 2.07   | High level   |
| 55  | Europe        | France                   | 1.17     | 3.04    | 1.42   | High level   |
| 56  | Africa        | Gabon                    | -0.79    | -2.03   | -0.91  | Low level    |
| 57  | Africa        | Gambia                   | -0.34    | -0.90   | -0.46  | Middle level |
| 58  | Asia          | Georgia                  | 0.45     | 1.21    | 0.60   | High level   |
| 59  | Europe        | Germany                  | 1.46     | 3.80    | 1.74   | High level   |
| 60  | Africa        | Ghana                    | 0.05     | 0.12    | -0.02  | Middle level |
| 61  | Europe        | Greece                   | 0.39     | 1.00    | 0.33   | Middle level |
| 62  | North America | Guatemala                | -0.62    | -1.60   | -0.81  | Low level    |

Supplementary materials

3

|     |               |                  |       |       |       |              |
|-----|---------------|------------------|-------|-------|-------|--------------|
| 63  | Africa        | Guinea           | -0.87 | -2.25 | -1.04 | Low level    |
| 64  | South America | Guyana           | -0.25 | -0.66 | -0.38 | Middle level |
| 65  | North America | Haiti            | -1.18 | -3.06 | -1.36 | Low level    |
| 66  | North America | Honduras         | -0.67 | -1.72 | -0.83 | Low level    |
| 67  | Asia          | Hong Kong,China  | 1.16  | 3.10  | 1.64  | High level   |
| 68  | Europe        | Hungary          | 0.42  | 1.11  | 0.45  | High level   |
| 69  | Europe        | Iceland          | 1.56  | 4.03  | 1.75  | High level   |
| 70  | Asia          | India            | -0.11 | -0.27 | -0.08 | Middle level |
| 71  | Asia          | Indonesia        | -0.17 | -0.42 | -0.22 | Middle level |
| 72  | Asia          | Iran             | -1.14 | -2.89 | -1.07 | Low level    |
| 73  | Asia          | Iraq             | -1.51 | -3.88 | -1.63 | Low level    |
| 74  | Europe        | Ireland          | 1.34  | 3.47  | 1.51  | High level   |
| 75  | Asia          | Israel           | 0.73  | 1.95  | 1.05  | High level   |
| 76  | Europe        | Italy            | 0.56  | 1.44  | 0.51  | High level   |
| 77  | North America | Jamaica          | 0.22  | 0.56  | 0.06  | Middle level |
| 78  | Asia          | Japan            | 1.32  | 3.44  | 1.55  | High level   |
| 79  | Asia          | Jordan           | -0.10 | -0.21 | 0.03  | Middle level |
| 80  | Asia          | Kazakhstan       | -0.30 | -0.71 | -0.28 | Middle level |
| 81  | Africa        | Kenya            | -0.55 | -1.39 | -0.55 | Low level    |
| 82  | Asia          | Kuwait           | -0.04 | -0.08 | 0.03  | Middle level |
| 83  | Asia          | Kyrgyzstan       | -0.62 | -1.60 | -0.78 | Low level    |
| 84  | Asia          | Laos             | -0.80 | -2.03 | -0.95 | Low level    |
| 85  | Europe        | Latvia           | 0.86  | 2.23  | 1.00  | High level   |
| 86  | Asia          | Lebanon          | -0.90 | -2.29 | -0.93 | Low level    |
| 87  | Africa        | Lesotho          | -0.35 | -0.92 | -0.44 | Middle level |
| 88  | Africa        | Liberia          | -0.75 | -1.97 | -1.02 | Low level    |
| 89  | Europe        | Lithuania        | 0.96  | 2.49  | 1.06  | High level   |
| 90  | Europe        | Luxembourg       | 1.70  | 4.41  | 1.93  | High level   |
| 91  | Asia          | Macau,China      | 0.89  | 2.37  | 1.07  | High level   |
| 92  | Africa        | Madagascar       | -0.73 | -1.90 | -0.98 | Low level    |
| 93  | Africa        | Malawi           | -0.49 | -1.27 | -0.58 | Low level    |
| 94  | Asia          | Malaysia         | 0.43  | 1.16  | 0.59  | High level   |
| 95  | Africa        | Mali             | -0.95 | -2.43 | -0.93 | Low level    |
| 96  | Europe        | Malta            | 0.87  | 2.23  | 0.89  | High level   |
| 97  | Africa        | Mauritania       | -0.67 | -1.71 | -0.72 | Low level    |
| 98  | Africa        | Mauritius        | 0.76  | 1.98  | 0.81  | High level   |
| 99  | North America | Mexico           | -0.37 | -0.95 | -0.47 | Middle level |
| 100 | Europe        | Moldova          | -0.31 | -0.78 | -0.37 | Middle level |
| 101 | Asia          | Mongolia         | 0.01  | 0.01  | -0.17 | Middle level |
| 102 | Africa        | Morocco          | -0.29 | -0.71 | -0.24 | Middle level |
| 103 | Africa        | Mozambique       | -0.77 | -1.99 | -0.93 | Low level    |
| 104 | Asia          | Myanmar          | -0.95 | -2.43 | -1.03 | Low level    |
| 105 | Africa        | Namibia          | 0.29  | 0.73  | 0.25  | Middle level |
| 106 | Asia          | Nepal            | -0.59 | -1.54 | -0.71 | Low level    |
| 107 | Europe        | Netherlands      | 1.65  | 4.28  | 1.93  | High level   |
| 108 | Oceania       | New Zealand      | 1.78  | 4.61  | 2.01  | High level   |
| 109 | North America | Nicaragua        | -0.98 | -2.49 | -1.09 | Low level    |
| 110 | Africa        | Niger            | -0.75 | -1.91 | -0.72 | Low level    |
| 111 | Africa        | Nigeria          | -1.05 | -2.68 | -1.08 | Low level    |
| 112 | Europe        | Norway           | 1.77  | 4.58  | 2.04  | High level   |
| 113 | Asia          | Oman             | 0.17  | 0.50  | 0.35  | Middle level |
| 114 | Asia          | Pakistan         | -0.99 | -2.49 | -0.87 | Low level    |
| 115 | North America | Panama           | 0.11  | 0.27  | -0.02 | Middle level |
| 116 | Oceania       | Papua New Guinea | -0.65 | -1.69 | -0.81 | Low level    |
| 117 | South America | Paraguay         | -0.34 | -0.90 | -0.52 | Middle level |
| 118 | South America | Peru             | -0.05 | -0.12 | -0.18 | Middle level |
| 119 | Asia          | Philippines      | -0.31 | -0.77 | -0.34 | Middle level |
| 120 | Europe        | Poland           | 0.65  | 1.68  | 0.67  | High level   |
| 121 | Europe        | Portugal         | 1.07  | 2.74  | 1.14  | High level   |
| 122 | Asia          | Qatar            | 0.40  | 1.11  | 0.65  | Middle level |
| 123 | Europe        | Romania          | 0.24  | 0.61  | 0.21  | Middle level |
| 124 | Europe        | Russia           | -0.58 | -1.45 | -0.61 | Low level    |
| 125 | Asia          | Rwanda           | -0.01 | 0.03  | 0.11  | Middle level |
| 126 | Asia          | Saudi Arabia     | -0.23 | -0.49 | 0.02  | Middle level |
| 127 | Africa        | Senegal          | 0.00  | -0.01 | -0.08 | Middle level |
| 128 | Europe        | Serbia           | -0.08 | -0.20 | -0.12 | Middle level |

| Supplementary materials |               |                      |       |       |       |              |
|-------------------------|---------------|----------------------|-------|-------|-------|--------------|
| 129                     | Africa        | Seychelles           | 0.42  | 1.08  | 0.38  | High level   |
| 130                     | Africa        | Sierra Leone         | -0.56 | -1.49 | -0.78 | Low level    |
| 131                     | Asia          | Singapore            | 1.63  | 4.30  | 2.04  | High level   |
| 132                     | Europe        | Slovakia             | 0.71  | 1.83  | 0.70  | High level   |
| 133                     | Europe        | Slovenia             | 0.99  | 2.56  | 1.12  | High level   |
| 134                     | Oceania       | Solomon Islands      | -0.15 | -0.44 | -0.34 | Middle level |
| 135                     | Africa        | Somalia              | -2.12 | -5.45 | -2.36 | Low level    |
| 136                     | Africa        | South Africa         | 0.16  | 0.42  | 0.11  | Middle level |
| 137                     | Asia          | South Korea          | 0.94  | 2.46  | 1.15  | High level   |
| 138                     | Europe        | Spain                | 0.85  | 2.20  | 0.98  | High level   |
| 139                     | Asia          | Sri Lanka            | -0.15 | -0.38 | -0.15 | Middle level |
| 140                     | Africa        | Sudan                | -1.52 | -3.88 | -1.55 | Low level    |
| 141                     | South America | Suriname             | -0.20 | -0.56 | -0.31 | Middle level |
| 142                     | Europe        | Sweden               | 1.72  | 4.45  | 2.00  | High level   |
| 143                     | Europe        | Switzerland          | 1.73  | 4.48  | 1.98  | High level   |
| 144                     | Asia          | Tajikistan           | -1.17 | -2.98 | -1.29 | Low level    |
| 145                     | Africa        | Tanzania             | -0.56 | -1.44 | -0.65 | Low level    |
| 146                     | Asia          | Thailand             | -0.20 | -0.45 | -0.05 | Middle level |
| 147                     | Asia          | Timor                | -0.42 | -1.16 | -0.78 | Middle level |
| 148                     | Africa        | Togo                 | -0.74 | -1.90 | -0.78 | Low level    |
| 149                     | North America | Trinidad and Tobago  | 0.05  | 0.11  | -0.05 | Middle level |
| 150                     | Africa        | Tunisia              | -0.18 | -0.47 | -0.13 | Middle level |
| 151                     | Asia          | Turkey               | -0.45 | -1.09 | -0.30 | Middle level |
| 152                     | Africa        | Uganda               | -0.62 | -1.57 | -0.62 | Low level    |
| 153                     | Europe        | Ukraine              | -0.57 | -1.46 | -0.61 | Low level    |
| 154                     | Asia          | United Arab Emirates | 0.65  | 1.77  | 0.94  | High level   |
| 155                     | Europe        | United Kingdom       | 1.37  | 3.57  | 1.65  | High level   |
| 156                     | North America | United States        | 1.13  | 2.96  | 1.41  | High level   |
| 157                     | South America | Uruguay              | 0.90  | 2.28  | 0.85  | High level   |
| 158                     | Asia          | Uzbekistan           | -0.91 | -2.33 | -1.03 | Low level    |
| 159                     | Oceania       | Vanuatu              | 0.10  | 0.20  | -0.07 | Middle level |
| 160                     | Asia          | Vietnam              | -0.33 | -0.80 | -0.24 | Middle level |
| 161                     | Asia          | West Bank and Gaza   | -0.73 | -1.81 | -0.57 | Low level    |
| 162                     | Africa        | Zambia               | -0.45 | -1.18 | -0.57 | Middle level |
| 163                     | Africa        | Zimbabwe             | -1.20 | -3.10 | -1.37 | Low level    |

**Notes:** I newly create three WGI composite indices based on all six dimensions of WGI from the WB. Mean\_WGI is the mean of all six WGI dimensions. PCA\_WGI is a composite WGI index by using Principal Component Analysis. FA\_WGI is a composite WGI index by using Factor Analysis. I rank the level of governance quality based on the value of Mean\_WGI. Notably, Qatar is considered as a high-level governance quality country rather than a middle-level one when using PCA\_WGI and FA\_WGI to substitute WGI. Opposite to Qatar, Seychelles is a high-level one when using Mean\_WGI but a middle-level one with PCA\_WGI or FA\_WGI. Additionally, three countries (Ecuador, Timor, Zambia) are those with low governance quality by FA\_WGI while middle by Mean\_WGI or PCA\_WGI. Another three (Burkina Faso, Cote d'Ivoire, Kenya) are those with middle governance quality by FA\_WGI while low by Mean\_WGI or PCA\_WGI.

**Table S3 Regression results of the main model**

|                                          | Pooled data        |                    |                    |                    | Panel data        |                     |                   |                     |
|------------------------------------------|--------------------|--------------------|--------------------|--------------------|-------------------|---------------------|-------------------|---------------------|
|                                          | (1)                | (2)                | (3)                | (4)                | (1)               | (2)                 | (3)               | (4)                 |
| Mean_WGI squared                         | -9.11***<br>(0.74) | -1.56***<br>(0.60) | -8.72***<br>(0.58) | -3.31***<br>(0.44) | -8.51**<br>(4.11) | -34.11***<br>(1.24) | -9.30**<br>(4.39) | -23.14***<br>(1.97) |
| Mean_WGI                                 | 15.36***<br>(1.69) | 0.00<br>(.)        | 11.69***<br>(1.34) | 0.00<br>(.)        | 15.56<br>(9.75)   | 91.20***<br>(3.93)  | 13.79<br>(10.49)  | 56.64***<br>(5.97)  |
| Hospitalizations                         | 4.38***<br>(0.15)  | 5.62***<br>(0.18)  | 2.00***<br>(0.15)  | 3.37***<br>(0.18)  | 5.59***<br>(1.35) | 5.62***<br>(1.37)   | 3.35***<br>(1.20) | 3.37***<br>(1.21)   |
| GDP per capita                           | 7.80***<br>(0.85)  | 9.52***<br>(1.57)  | 9.45***<br>(0.68)  | 9.85***<br>(1.16)  | 7.06<br>(5.29)    | -21.66***<br>(0.06) | 9.10**<br>(4.48)  | -17.83***<br>(0.70) |
| Population                               | 2.85***<br>(0.10)  | 1.83***<br>(0.14)  | 3.24***<br>(0.08)  | 2.63***<br>(0.11)  | 2.74***<br>(0.72) | 2.61***<br>(0.06)   | 3.14***<br>(0.60) | 3.41***<br>(0.13)   |
| Population density                       | -0.08<br>(0.12)    | 1.37***<br>(0.17)  | -0.02<br>(0.10)    | 1.03***<br>(0.13)  | 0.10<br>(0.84)    | 0.33***<br>(0.03)   | 0.02<br>(0.73)    | -0.06<br>(0.13)     |
| Individual fixed effect                  | No                 | Yes                | No                 | Yes                | No                | Yes                 | No                | Yes                 |
| Time fixed effect                        | No                 | No                 | Yes                | Yes                | No                | No                  | Yes               | Yes                 |
| <i>Observations</i>                      | 9092               | 9092               | 9092               | 9092               | 9092              | 9092                | 9092              | 9092                |
| <i>R</i> <sup>2</sup>                    | 0.17               | 0.31               | 0.48               | 0.60               |                   |                     |                   |                     |
| <i>R</i> <sup>2</sup> <sub>overall</sub> |                    |                    |                    |                    | 0.17              | 0.31                | 0.48              | 0.60                |
| <i>R</i> <sup>2</sup> <sub>between</sub> |                    |                    |                    |                    | 0.37              | 1.00                | 0.46              | 1.00                |
| <i>R</i> <sup>2</sup> <sub>within</sub>  |                    |                    |                    |                    | 0.12              | 0.12                | 0.49              | 0.49                |

**Notes:** In all columns I report standard beta coefficients and corresponding significance (\* p < 0.1, \*\* p < 0.05, \*\*\* p < 0.01). Heteroskedasticity-robust standard errors in parentheses. Governance quality is measured by Mean\_WGI-the mean of all six WGI dimensions. Calculated by Stata 17.0.
